# Supplementary material
Source: PubMed Central journal article supplement (PMC3571273)
Supplement: CVI.00622-12_zcd999094656so1.pdf [file CVI.00622-12_zcd999094656so1.pdf]

**Supplementary Table 1. Proteins identified in *Mannheimia haemolytica* membrane vesicles.** *M. haemolytica* vesicles were extracted and subjected to LC-MS/MS where proteins that constitute these structures were identified as described in the manuscript. Each protein was further analyzed with Bioinformatic Tools. A total of 226 proteins were identified from vesicles extracts. Predictions using bioinformatic tools indicate that 104 (46%) of these are of cytoplasmic origin, 58 (25.6%) are either periplasmic or outer membrane and one (0.4%) is the extracellular protein leukotoxin. The remaining 63 (27.8%) proteins are either of unknown locale or of cytoplasmic membrane.

|    | Protein name                                                                 | Protein GI number | PSORTb               | LipoP | Protein molecular weight (Da) | Protein identification probability | Number of unique peptides | Number of unique spectra | Number of total spectra | Percentage of total spectra | Percentage sequence coverage |        |
|----|------------------------------------------------------------------------------|-------------------|----------------------|-------|-------------------------------|------------------------------------|---------------------------|--------------------------|-------------------------|-----------------------------|------------------------------|--------|
| 1  | 2,3,4,5-tetrahydropyridine-2,6-dicarboxylate N-succinyltransferase           | 254362937         | Cytoplasmic          | 9.97  | Cytoplasmic                   | 29392.9                            | 99.80%                    | 2                        | 2                       | 4                           | 0.05%                        | 7.66%  |
| 2  | 2',3'-cyclic-nucleotide 2'-phosphodiesterase                                 | 254362830         | Periplasmic          | 9.76  | Signal peptide                | 72799.3                            | 100.00%                   | 3                        | 3                       | 5                           | 0.07%                        | 5.02%  |
| 3  | 3-deoxy-8-phosphooctulonate synthase                                         | 254362304         | Cytoplasmic          | 9.97  | Cytoplasmic                   | 31101.9                            | 100.00%                   | 5                        | 5                       | 6                           | 0.08%                        | 16.20% |
| 4  | 3-oxoacyl-[acyl-carrier-protein] reductase                                   | 254363104         | Cytoplasmic          | 9.26  | Cytoplasmic                   | 25185.5                            | 100.00%                   | 3                        | 3                       | 6                           | 0.08%                        | 12.10% |
| 5  | 6-phosphofructokinase                                                        | 32035193          | Cytoplasmic          | 9.26  | Cytoplasmic                   | 35105.5                            | 99.80%                    | 2                        | 2                       | 4                           | 0.05%                        | 8.39%  |
| 6  | ABC superfamily ATP binding cassette transporter, binding protein            | 254361825         | Cytoplasmic Membrane | 9.97  | lipoprotein signal peptide    | 29,974.30                          | 100.00%                   | 5                        | 5                       | 11                          | 0.09%                        | 24.90% |
| 7  | ABC superfamily ATP binding cassette transporter, binding protein            | 254362423         | Unknown              |       | Signal peptide                | 23162.8                            | 99.80%                    | 2                        | 2                       | 5                           | 0.07%                        | 9.00%  |
| 8  | ABC superfamily ATP binding cassette transporter, binding protein            | 254362968         | Periplasmic          | 10.00 | Signal peptide                | 57975.8                            | 100.00%                   | 3                        | 3                       | 5                           | 0.07%                        | 5.12%  |
| 9  | acetate kinase                                                               | 254362831         | Cytoplasmic          | 9.97  | Cytoplasmic                   | 43526.8                            | 100.00%                   | 3                        | 3                       | 5                           | 0.07%                        | 7.21%  |
| 10 | ADP-glyceromanno-heptose 6-epimerase                                         | 254361453         | Cytoplasmic          | 9.26  | Cytoplasmic                   | 34643.2                            | 100.00%                   | 3                        | 3                       | 5                           | 0.07%                        | 10.10% |
| 11 | alanine--tRNA ligase                                                         | 254360816         | Cytoplasmic          | 9.97  | Cytoplasmic                   | 96413.6                            | 100.00%                   | 7                        | 7                       | 13                          | 0.17%                        | 8.11%  |
| 12 | aldehyde-alcohol dehydrogenase                                               | 254360511         | Cytoplasmic          | 9.97  | Cytoplasmic                   | 95194.6                            | 100.00%                   | 8                        | 8                       | 13                          | 0.17%                        | 9.55%  |
| 13 | amino acid ABC superfamily ATP binding cassette transporter, binding protein | 254362204         | Periplasmic          | 10.00 | Signal peptide                | 28,024.10                          | 100.00%                   | 13                       | 15                      | 54                          | 0.43%                        | 56.40% |
| 14 | arginine ABC superfamily ATP binding cassette transporter, ABC protein       | 254360691         | Cytoplasmic          | 9.97  | Cytoplasmic                   | 49676.3                            | 99.80%                    | 2                        | 2                       | 4                           | 0.05%                        | 4.09%  |
| 15 | arginine ABC superfamily ATP binding cassette transporter, binding protein   | 254360693         | Periplasmic          | 10.00 | Signal peptide                | 26,659.40                          | 100.00%                   | 3                        | 3                       | 9                           | 0.07%                        | 18.90% |
| 16 | arginine ABC superfamily ATP binding cassette transporter, membrane protein  | 254360689         | Cytoplasmic          | 9.26  | Cytoplasmic                   | 18799                              | 99.90%                    | 2                        | 2                       | 5                           | 0.07%                        | 8.67%  |
| 17 | asparagine-tRNA ligase                                                       | 254362094         | Cytoplasmic          | 10.00 | Cytoplasmic                   | 52692.1                            | 100.00%                   | 4                        | 4                       | 8                           | 0.11%                        | 8.57%  |
| 18 | aspartate--ammonia ligase                                                    | 254361675         | Cytoplasmic          | 10.00 | Cytoplasmic                   | 37439.6                            | 100.00%                   | 6                        | 7                       | 14                          | 0.18%                        | 16.10% |
| 19 | bacteriophage major capsid protein N                                         | 254360870         | Cytoplasmic          | 8.96  | Cytoplasmic                   | 38628.5                            | 100.00%                   | 8                        | 9                       | 23                          | 0.30%                        | 23.10% |
| 20 | bacteriophage tail sheath protein FI                                         | 254360852         | Unknown              |       | Cytoplasmic                   | 43114.4                            | 100.00%                   | 8                        | 8                       | 16                          | 0.21%                        | 20.40% |
| 21 | bacteriophage tail tube protein FII                                          | 254360851         | Cytoplasmic          | 8.96  | Cytoplasmic                   | 18384.5                            | 100.00%                   | 3                        | 3                       | 8                           | 0.11%                        | 16.70% |
| 22 | biotin carboxylase                                                           | 254362943         | Cytoplasmic          | 9.97  | Cytoplasmic                   | 49240.8                            | 100.00%                   | 5                        | 5                       | 10                          | 0.13%                        | 13.40% |
| 23 | catalase                                                                     | 254361228         | Periplasmic          | 10.00 | Cytoplasmic                   | 56868.5                            | 100.00%                   | 10                       | 10                      | 16                          | 0.21%                        | 24.50% |
| 24 | cell division protein FtsZ                                                   | 254362457         | Unknown              |       | Cytoplasmic                   | 43607.8                            | 99.80%                    | 2                        | 2                       | 5                           | 0.07%                        | 6.02%  |
| 25 | cell division protein MukB                                                   | 254360811         | Cytoplasmic          | 9.94  | Cytoplasmic                   | 170217.2                           | 99.70%                    | 2                        | 2                       | 3                           | 0.04%                        | 1.21%  |
| 26 | chaperone DnaK                                                               | 254361232         | Cytoplasmic          | 9.97  | Cytoplasmic                   | 68126.1                            | 100.00%                   | 3                        | 3                       | 4                           | 0.05%                        | 5.54%  |
| 27 | chaperone GroEL                                                              | 254362013         | Cytoplasmic          | 9.97  | Cytoplasmic                   | 57558.6                            | 100.00%                   | 21                       | 27                      | 80                          | 1.05%                        | 38.30% |
| 28 | chaperone HtpG                                                               | 254360944         | Cytoplasmic          | 9.97  | Cytoplasmic                   | 71081.4                            | 100.00%                   | 8                        | 8                       | 13                          | 0.17%                        | 14.50% |
| 29 | CTP synthase                                                                 | 254363180         | Cytoplasmic          | 9.97  | Signal peptide                | 60060.8                            | 100.00%                   | 5                        | 5                       | 9                           | 0.12%                        | 9.17%  |
| 30 | cysteine desulfurase                                                         | 254361063         | Cytoplasmic          | 9.97  | Cytoplasmic                   | 45380.1                            | 99.80%                    | 2                        | 2                       | 3                           | 0.04%                        | 5.17%  |
| 31 | dihydrolipoyl dehydrogenase                                                  | 254362994         | Cytoplasmic          | 9.97  | Cytoplasmic                   | 50495.4                            | 100.00%                   | 8                        | 8                       | 25                          | 0.33%                        | 16.70% |

|    | Protein name                                                                  | Protein GI number | PSORTb             | LipoP                      | Protein molecular weight (Da) | Protein identification probability | Number of unique peptides | Number of unique spectra | Number of total spectra | Percentage of total spectra | Percentage sequence coverage |
|----|-------------------------------------------------------------------------------|-------------------|--------------------|----------------------------|-------------------------------|------------------------------------|---------------------------|--------------------------|-------------------------|-----------------------------|------------------------------|
| 32 | dihydrolipoyllysine-residue acetyltransferase                                 | 254362996         | Cytoplasmic 9.97   | Cytoplasmic                | 66697.1                       | 100.00%                            | 16                        | 18                       | 44                      | 0.58%                       | 25.80%                       |
| 33 | DNA uptake lipoprotein ComL                                                   | 254361950         | Outermembrane 9.92 | lipoprotein signal peptide | 29,736.20                     | 100.00%                            | 6                         | 7                        | 18                      | 0.14%                       | 25.10%                       |
| 34 | DNA-binding protein H-NS                                                      | 254361504         | Cytoplasmic 9.26   | Cytoplasmic                | 15053.9                       | 99.80%                             | 2                         | 2                        | 4                       | 0.05%                       | 14.30%                       |
| 35 | DNA-directed RNA polymerase subunit beta                                      | 254361140         | Cytoplasmic 9.97   | Cytoplasmic                | 149435.2                      | 100.00%                            | 9                         | 9                        | 16                      | 0.21%                       | 7.38%                        |
| 36 | DNA-directed RNA polymerase subunit beta prime                                | 254361142         | Cytoplasmic 9.97   | Cytoplasmic                | 157920.3                      | 100.00%                            | 10                        | 10                       | 14                      | 0.18%                       | 6.66%                        |
| 37 | DPS family DNA-binding protein                                                | 254362225         | Cytoplasmic 9.26   | Cytoplasmic                | 18,838.50                     | 99.90%                             | 2                         | 2                        | 2                       | 0.02%                       | 26.80%                       |
| 38 | D-ribose ABC superfamily ATP binding cassette transporter, binding protein    | 254362593         | Periplasmic 9.76   | Signal peptide             | 30272.1                       | 99.80%                             | 2                         | 2                        | 6                       | 0.08%                       | 7.19%                        |
| 39 | ECA biosynthesis protein WeccC                                                | 254360954         | Cytoplasmic 9.97   | Cytoplasmic                | 46531.5                       | 99.80%                             | 2                         | 2                        | 2                       | 0.03%                       | 4.49%                        |
| 40 | elongation factor EF1A                                                        | 254362571         | Cytoplasmic 9.97   | Cytoplasmic                | 43263.3                       | 100.00%                            | 17                        | 21                       | 66                      | 0.87%                       | 45.20%                       |
| 41 | elongation factor EF1B                                                        | 254360754         | Cytoplasmic 9.97   | Cytoplasmic                | 30190.2                       | 100.00%                            | 3                         | 3                        | 8                       | 0.11%                       | 10.60%                       |
| 42 | elongation factor EF2                                                         | 254362572         | Cytoplasmic 9.97   | Cytoplasmic                | 76998                         | 100.00%                            | 12                        | 13                       | 31                      | 0.41%                       | 20.00%                       |
| 43 | enoyl-[acyl-carrier-protein] reductase (NADH)                                 | 254360820         | Cytoplasmic 9.82   | Cytoplasmic                | 28125.1                       | 100.00%                            | 3                         | 3                        | 8                       | 0.11%                       | 11.00%                       |
| 44 | exo-alpha-sialidase                                                           | 254361924         | Unknown            | Signal peptide             | 65348.7                       | 100.00%                            | 11                        | 11                       | 26                      | 0.34%                       | 20.40%                       |
| 45 | formate C-acetyltransferase                                                   | 254362619         | Cytoplasmic 9.97   | Cytoplasmic                | 86697.8                       | 100.00%                            | 9                         | 9                        | 18                      | 0.24%                       | 12.00%                       |
| 46 | fructose-bisphosphate aldolase                                                | 254360596         | Cytoplasmic 8.96   | Cytoplasmic                | 39120.6                       | 100.00%                            | 5                         | 6                        | 9                       | 0.12%                       | 20.90%                       |
| 47 | galactoside ABC superfamily ATP binding cassette transporter, binding protein | 254361432         | unknown            | Cytoplasmic                | 33473.1                       | 100.00%                            | 11                        | 11                       | 22                      | 0.29%                       | 35.50%                       |
| 48 | glucose-6-phosphate isomerase                                                 | 254361902         | Cytoplasmic 9.97   | Cytoplasmic                | 61112.2                       | 99.70%                             | 2                         | 2                        | 2                       | 0.03%                       | 5.49%                        |
| 49 | glutamate dehydrogenase (NADP(+))                                             | 254361731         | Unknown            | Cytoplasmic                | 36884.4                       | 100.00%                            | 6                         | 6                        | 14                      | 0.18%                       | 20.20%                       |
| 50 | glutamate--ammonia ligase                                                     | 254361149         | Cytoplasmic 9.97   | Cytoplasmic                | 52405.5                       | 100.00%                            | 11                        | 11                       | 21                      | 0.28%                       | 20.30%                       |
| 51 | glyceraldehyde-3-phosphate dehydrogenase                                      | 254360874         | Cytoplasmic 9.97   | Cytoplasmic                | 35723.5                       | 100.00%                            | 10                        | 10                       | 22                      | 0.29%                       | 25.70%                       |
| 52 | glycerol kinase                                                               | 254360701         | Cytoplasmic 9.97   | Cytoplasmic                | 56031.9                       | 99.80%                             | 2                         | 2                        | 4                       | 0.05%                       | 3.58%                        |
| 53 | glycerophosphodiester phosphodiesterase                                       | 254362648         | Unknown            | Signal peptide             | 37005                         | 99.80%                             | 2                         | 2                        | 2                       | 0.03%                       | 7.79%                        |
| 54 | H(+)-transporting two-sector ATPase, F(1) beta subunit                        | 254361677         | Cytoplasm 9.12     | Cytoplasmic                | 49,767.00                     | 100.00%                            | 3                         | 3                        | 7                       | 0.06%                       | 9.63%                        |
| 55 | hypothetical bacteriophage protein                                            | 254362878         | Unknown            | Cytoplasmic                | 33660.8                       | 100.00%                            | 4                         | 4                        | 7                       | 0.09%                       | 15.20%                       |
| 56 | hypothetical bacteriophage protein                                            | 254361390         | Unknown            | lipoprotein signal peptide | 12661.3                       | 100.00%                            | 3                         | 3                        | 6                       | 0.08%                       | 22.50%                       |
| 57 | hypothetical bacteriophage protein                                            | 254361480         | Cytoplasmic 8.96   | Cytoplasmic                | 29,800.90                     | 99.80%                             | 2                         | 2                        | 3                       | 0.02%                       | 10.90%                       |
| 58 | hypothetical protein MHA_0070                                                 | 254360521         | Unknown            | Signal peptide             | 13994                         | 99.80%                             | 2                         | 2                        | 6                       | 0.08%                       | 17.10%                       |
| 59 | hypothetical protein MHA_0080                                                 | 254360531         | Unknown            | Signal peptide             | 81245.3                       | 100.00%                            | 6                         | 6                        | 13                      | 0.17%                       | 8.25%                        |
| 60 | hypothetical protein MHA_0181                                                 | 254360625         | Unknown            | lipoprotein signal peptide | 19039.1                       | 99.80%                             | 2                         | 2                        | 4                       | 0.05%                       | 11.40%                       |
| 61 | hypothetical protein MHA_0367                                                 | 254360803         | Unknown            | Signal peptide             | 11236.7                       | 100.00%                            | 4                         | 4                        | 9                       | 0.12%                       | 43.70%                       |
| 62 | hypothetical protein MHA_0410                                                 | 254360844         | Unknown            | Signal peptide             | 12103.4                       | 100.00%                            | 6                         | 7                        | 14                      | 0.18%                       | 40.40%                       |
| 63 | hypothetical protein MHA_0488                                                 | 254360922         | Unknown            | lipoprotein signal peptide | 21298.9                       | 100.00%                            | 9                         | 13                       | 37                      | 0.49%                       | 41.70%                       |
| 64 | hypothetical protein MHA_0504                                                 | 254360937         | Unknown            | lipoprotein signal peptide | 22,488.60                     | 100.00%                            | 4                         | 4                        | 12                      | 0.10%                       | 17.70%                       |
| 65 | hypothetical protein MHA_0524                                                 | 254360956         | Unknown            | Cytoplasmic                | 41120.1                       | 100.00%                            | 3                         | 3                        | 5                       | 0.07%                       | 10.10%                       |
| 66 | hypothetical protein MHA_0525                                                 | 254360957         | Cytoplasmic 8.96   | Cytoplasmic                | 30536.8                       | 100.00%                            | 3                         | 3                        | 7                       | 0.09%                       | 8.96%                        |
| 67 | hypothetical protein MHA_0579                                                 | 254361008         | Unknown            | Signal peptide             | 15,701.20                     | 99.80%                             | 2                         | 2                        | 10                      | 0.08%                       | 25.20%                       |
| 68 | hypothetical protein MHA_0680                                                 | 254361100         | Unknown            | Signal peptide             | 17680.4                       | 99.50%                             | 2                         | 2                        | 4                       | 0.05%                       | 13.90%                       |

|    | Protein name                                                                       | Protein GI number | PSORTb              | LipoP | Protein molecular weight (Da) | Protein identification probability | Number of unique peptides | Number of unique spectra | Number of total spectra | Percentage of total spectra | Percentage sequence coverage |        |
|----|------------------------------------------------------------------------------------|-------------------|---------------------|-------|-------------------------------|------------------------------------|---------------------------|--------------------------|-------------------------|-----------------------------|------------------------------|--------|
| 69 | hypothetical protein MHA_0690                                                      | 254361110         | OuterMembrane       | 9.93  | Signal peptide                | 29,201.90                          | 100.00%                   | 6                        | 7                       | 17                          | 0.14%                        | 24.30% |
| 70 | hypothetical protein MHA_0837                                                      | 254361251         | CytoplasmicMembrane | 7.88  | lipoprotein signal peptide    | 35870                              | 100.00%                   | 4                        | 4                       | 13                          | 0.17%                        | 12.10% |
| 71 | hypothetical protein MHA_0861                                                      | 254361274         | Unknown             |       | lipoprotein signal peptide    | 53013.8                            | 100.00%                   | 6                        | 6                       | 8                           | 0.11%                        | 12.80% |
| 72 | hypothetical protein MHA_0915                                                      | 254361325         | Unknown             |       | Signal peptide                | 12,642.80                          | 99.80%                    | 2                        | 3                       | 11                          | 0.09%                        | 32.20% |
| 73 | hypothetical protein MHA_0965                                                      | 254361375         | Unknown             |       | lipoprotein signal peptide    | 29719.5                            | 100.00%                   | 25                       | 36                      | 132                         | 1.73%                        | 53.60% |
| 74 | hypothetical protein MHA_1154                                                      | 254361553         | Periplasmic         | 9.84  | lipoprotein signal peptide    | 27036.5                            | 99.90%                    | 2                        | 3                       | 9                           | 0.12%                        | 8.10%  |
| 75 | hypothetical protein MHA_1406                                                      | 254361799         | OuterMembrane       | 9.92  | lipoprotein signal peptide    | 43084.4                            | 100.00%                   | 9                        | 12                      | 31                          | 0.41%                        | 24.60% |
| 76 | hypothetical protein MHA_1610                                                      | 254361999         | Unknown             |       | Signal peptide                | 22,270.80                          | 100.00%                   | 6                        | 6                       | 18                          | 0.14%                        | 27.70% |
| 77 | hypothetical protein MHA_1611                                                      | 254362000         | Unknown             |       | lipoprotein signal peptide    | 15306.8                            | 99.80%                    | 2                        | 2                       | 3                           | 0.04%                        | 17.30% |
| 78 | hypothetical protein MHA_1671                                                      | 254362061         | Unknown             |       | Signal peptide                | 16,049.80                          | 100.00%                   | 7                        | 8                       | 20                          | 0.16%                        | 52.00% |
| 79 | hypothetical protein MHA_1900                                                      | 254362291         | Unknown             |       | lipoprotein signal peptide    | 20603.7                            | 100.00%                   | 4                        | 4                       | 10                          | 0.13%                        | 20.80% |
| 80 | hypothetical protein MHA_1915                                                      | 254362307         | Unknown             |       | lipoprotein signal peptide    | 22783.6                            | 100.00%                   | 4                        | 5                       | 21                          | 0.28%                        | 17.50% |
| 81 | hypothetical protein MHA_1931                                                      | 254362323         | Unknown             |       | lipoprotein signal peptide    | 10680.1                            | 99.80%                    | 2                        | 2                       | 5                           | 0.07%                        | 24.50% |
| 82 | hypothetical protein MHA_2025                                                      | 254362418         | Unknown             |       | lipoprotein signal peptide    | 18490.8                            | 100.00%                   | 6                        | 8                       | 21                          | 0.28%                        | 37.70% |
| 83 | hypothetical protein MHA_2087                                                      | 254362480         | OuterMembrane       | 9.93  | lipoprotein signal peptide    | 19,396.70                          | 100.00%                   | 7                        | 8                       | 22                          | 0.18%                        | 41.40% |
| 84 | hypothetical protein MHA_2126                                                      | 254362519         | Unknown             |       | lipoprotein signal peptide    | 17,712.60                          | 100.00%                   | 4                        | 4                       | 12                          | 0.10%                        | 37.00% |
| 85 | hypothetical protein MHA_2237                                                      | 254362641         | Unknown             |       | Signal peptide                | 18298.9                            | 100.00%                   | 9                        | 10                      | 24                          | 0.32%                        | 34.30% |
| 86 | hypothetical protein MHA_2300                                                      | 254362706         | Unknown             |       | Cytoplasmic                   | 11,908.60                          | 99.80%                    | 2                        | 3                       | 10                          | 0.08%                        | 20.40% |
| 87 | hypothetical protein MHA_2753                                                      | 254363170         | Unknown             |       | lipoprotein signal peptide    | 14,117.90                          | 99.70%                    | 2                        | 2                       | 6                           | 0.05%                        | 20.30% |
| 88 | incomplete ribosomal protein L21                                                   | 33147673          | unknown             |       | Cytoplasmic                   | 7436                               | 99.80%                    | 2                        | 3                       | 5                           | 0.07%                        | 28.20% |
| 89 | initiation factor IF2-1                                                            | 254361246         | Cytoplasmic         | 9.97  | Cytoplasmic                   | 91804.6                            | 99.80%                    | 2                        | 2                       | 4                           | 0.05%                        | 2.37%  |
| 90 | inorganic diphosphatase                                                            | 254361193         | Cytoplasmic         | 9.97  | Cytoplasmic                   | 19337.2                            | 100.00%                   | 3                        | 3                       | 5                           | 0.07%                        | 17.70% |
| 91 | iron (Fe3+) ABC superfamily ATP binding cassette transporter, binding protein      | 254360752         | Unknown             |       | Cytoplasmic                   | 35641                              | 100.00%                   | 8                        | 8                       | 16                          | 0.21%                        | 23.00% |
| 92 | iron (Fe3+) ABC superfamily ATP binding cassette transporter, binding protein      | 254362568         | Unknown             |       | Cytoplasmic                   | 26,886.00                          | 99.70%                    | 2                        | 3                       | 5                           | 0.04%                        | 9.09%  |
| 93 | iron (Fe3+) ABC superfamily ATP binding cassette transporter, binding protein YfeA | 254362889         | Periplasmic         | 10.00 | Signal peptide                | 32012.2                            | 100.00%                   | 9                        | 9                       | 15                          | 0.20%                        | 40.10% |
| 94 | iron-regulated outer membrane protein                                              | 254362499         | OuterMembrane       | 10.00 | Cytoplasmic                   | 68970.4                            | 100.00%                   | 23                       | 27                      | 76                          | 1.00%                        | 39.80% |

|     | Protein name                                                                   | Protein GI number | PSORTb        | LipoP | Protein molecular weight (Da)  | Protein identification probability | Number of unique peptides | Number of unique spectra | Number of total spectra | Percentage of total spectra | Percentage sequence coverage |        |
|-----|--------------------------------------------------------------------------------|-------------------|---------------|-------|--------------------------------|------------------------------------|---------------------------|--------------------------|-------------------------|-----------------------------|------------------------------|--------|
| 95  | leukotoxin                                                                     | 254360695         | Extracellular | 10.00 | Cytoplasmic                    | 101983.4                           | 100.00%                   | 64                       | 87                      | 367                         | 4.81%                        | 58.80% |
| 96  | lipoprotein                                                                    | 254362686         | Periplasmic   | 9.83  | lipoprotein signal peptide     | 20666.6                            | 100.00%                   | 4                        | 5                       | 11                          | 0.14%                        | 27.80% |
| 97  | lipoprotein                                                                    | 254362006         | Unknown       |       | lipoprotein signal peptide     | 13891.2                            | 99.80%                    | 2                        | 2                       | 6                           | 0.08%                        | 21.80% |
| 98  | lipoprotein LppC                                                               | 254363151         | Unknown       |       | lipoprotein signal peptide     | 63354.9                            | 100.00%                   | 21                       | 23                      | 62                          | 0.81%                        | 37.70% |
| 99  | lipoprotein PlpD                                                               | 254361857         | OuterMembrane | 9.92  | lipoprotein signal peptide     | 31,377.30                          | 100.00%                   | 3                        | 3                       | 11                          | 0.09%                        | 14.10% |
| 100 | lipoprotein VacJ                                                               | 254363251         | OuterMembrane | 9.92  | n-terminal transmembrane helix | 14040.5                            | 99.80%                    | 2                        | 2                       | 5                           | 0.07%                        | 14.80% |
| 101 | lytic murein transglycosylase                                                  | 254360683         | unknown       |       | lipoprotein signal peptide     | 39087.7                            | 99.90%                    | 2                        | 2                       | 3                           | 0.04%                        | 6.57%  |
| 102 | M17 family leucyl aminopeptidase                                               | 254360526         | Cytoplasmic   | 9.97  | Cytoplasmic                    | 54139.2                            | 99.80%                    | 2                        | 2                       | 3                           | 0.04%                        | 4.82%  |
| 103 | M23B subfamily peptidase/lipoprotein                                           | 254362197         | OuterMembrane | 9.92  | lipoprotein signal peptide     | 44631.6                            | 100.00%                   | 10                       | 11                      | 24                          | 0.32%                        | 28.20% |
| 104 | M48 family peptidase                                                           | 254361194         | Unknown       |       | lipoprotein signal peptide     | 27129.8                            | 99.80%                    | 2                        | 2                       | 8                           | 0.11%                        | 9.16%  |
| 105 | maltoporin                                                                     | 254360673         | OuterMembrane | 10.00 | Signal peptide                 | 47547.7                            | 100.00%                   | 6                        | 6                       | 12                          | 0.16%                        | 13.50% |
| 106 | maltose ABC superfamily ATP binding cassette transporter, binding protein MaE  | 254360675         | Periplasmic   | 10.00 | Signal peptide                 | 43,380.80                          | 100.00%                   | 3                        | 3                       | 3                           | 0.02%                        | 7.58%  |
| 107 | membrane-bound lytic murein transglycosylase                                   | 254361537         | OuterMembra   | 9.93  | lipoprotein signal peptide     | 40087.5                            | 100.00%                   | 4                        | 4                       | 9                           | 0.12%                        | 13.00% |
| 108 | Mu bacteriophage protein T                                                     | 254361342         | Unknown       |       | Cytoplasmic                    | 33948.3                            | 100.00%                   | 7                        | 7                       | 23                          | 0.30%                        | 24.90% |
| 109 | Mu bacteriophage tail sheath protein GpL                                       | 254361347         | Unknown       |       | Cytoplasmic                    | 42692                              | 99.80%                    | 2                        | 2                       | 3                           | 0.04%                        | 5.26%  |
| 110 | multicopper (Cu2+) oxidase                                                     | 254361561         | Unknown       |       | Signal peptide                 | 58,625.50                          | 100.00%                   | 3                        | 3                       | 4                           | 0.03%                        | 6.02%  |
| 111 | N utilization substance A                                                      | 254361245         | Cytoplasmic   | 9.97  | Cytoplasmic                    | 55480.3                            | 99.70%                    | 2                        | 2                       | 3                           | 0.04%                        | 3.41%  |
| 112 | N-acylneuraminate cytidyltransferase                                           | 254360557         | Cytoplasmic   | 9.97  | Cytoplasmic                    | 48190.5                            | 99.80%                    | 2                        | 2                       | 2                           | 0.03%                        | 4.77%  |
| 113 | naphthoate synthase                                                            | 254362223         | Cytoplasmic   | 9.26  | Cytoplasmic                    | 31894.5                            | 99.90%                    | 2                        | 2                       | 4                           | 0.05%                        | 7.37%  |
| 114 | nitrate reductase                                                              | 254361386         | Periplasmic   | 9.93  | Signal peptide                 | 94234.8                            | 99.80%                    | 2                        | 2                       | 2                           | 0.03%                        | 2.28%  |
| 115 | oligopeptide ABC superfamily ATP binding cassette transporter, binding protein | 254362033         | Periplasmic   | 10.00 | Cytoplasmic                    | 58,479.80                          | 99.80%                    | 2                        | 2                       | 2                           | 0.02%                        | 3.28%  |
| 116 | OMR family outer membrane iron receptor                                        | 254361273         | OuterMembrane | 9.52  | Signal peptide                 | 89700.1                            | 100.00%                   | 4                        | 4                       | 7                           | 0.09%                        | 5.19%  |
| 117 | orotidine-5'-phosphate decarboxylase                                           | 254361241         | Cytoplasmic   | 9.97  | Cytoplasmic                    | 25392.6                            | 99.80%                    | 2                        | 2                       | 3                           | 0.04%                        | 8.70%  |
| 118 | outer membrane lipoprotein                                                     | 254361177         | OuterMembrane | 9.93  | lipoprotein signal peptide     | 15487.2                            | 100.00%                   | 3                        | 3                       | 11                          | 0.14%                        | 20.80% |
| 119 | outer membrane lipoprotein PlpE                                                | 254361907         | Unknown       |       | lipoprotein signal peptide     | 31006                              | 100.00%                   | 25                       | 38                      | 116                         | 1.52%                        | 48.60% |
| 120 | outer membrane protein D15                                                     | 254361111         | OuterMembrane | 10.00 | Signal peptide                 | 88750.9                            | 100.00%                   | 18                       | 19                      | 41                          | 0.54%                        | 27.20% |
| 121 | outer membrane protein OmpA                                                    | 254361457         | OuterMembrane | 10.00 | Cytoplasmic                    | 24721                              | 100.00%                   | 15                       | 25                      | 200                         | 2.62%                        | 70.40% |

|     | Protein name                                                                          | Protein GI number | PSORTb                   | LipoP                      | Protein molecular weight (Da) | Protein identification probability | Number of unique peptides | Number of unique spectra | Number of total spectra | Percentage of total spectra | Percentage sequence coverage |
|-----|---------------------------------------------------------------------------------------|-------------------|--------------------------|----------------------------|-------------------------------|------------------------------------|---------------------------|--------------------------|-------------------------|-----------------------------|------------------------------|
| 122 | outer membrane protein P1                                                             | 254361061         | OuterMembrane 10.00      | Signal peptide             | 52807.2                       | 100.00%                            | 18                        | 28                       | 78                      | 1.02%                       | 37.30%                       |
| 123 | outer membrane protein P2                                                             | 254361153         | OuterMembrane 10.00      | Signal peptide             | 41068.4                       | 100.00%                            | 19                        | 21                       | 57                      | 0.75%                       | 49.20%                       |
| 124 | oxoglutarate dehydrogenase (succinyl-transferring)                                    | 254361863         | Cytoplasmic 9.97         | Cytoplasmic                | 44912.4                       | 100.00%                            | 2                         | 2                        | 4                       | 0.05%                       | 9.05%                        |
| 125 | peptidoglycan-associated outer membrane lipoprotein                                   | 254360704         | OuterMembrane 9.93       | lipoprotein signal peptide | 16792.8                       | 100.00%                            | 5                         | 8                        | 23                      | 0.30%                       | 44.10%                       |
| 126 | peptidylprolyl isomerase                                                              | 254360924         | Cytoplasmic 9.26         | Cytoplasmic                | 22295.3                       | 99.80%                             | 2                         | 2                        | 3                       | 0.04%                       | 12.00%                       |
| 127 | peptidylprolyl isomerase                                                              | 254361132         | Periplasmic 9.76         | Signal peptide             | 26333.7                       | 100.00%                            | 4                         | 4                        | 5                       | 0.07%                       | 15.40%                       |
| 128 | peptidylprolyl isomerase                                                              | 254362982         | Periplasmic 9.76         | Signal peptide             | 34,444.50                     | 100.00%                            | 3                         | 3                        | 4                       | 0.03%                       | 10.20%                       |
| 129 | peroxiredoxin/glutaredoxin family protein                                             | 254363241         | Unknown                  | Cytoplasmic                | 26920.2                       | 100.00%                            | 10                        | 10                       | 28                      | 0.37%                       | 43.40%                       |
| 130 | phosphate ABC superfamily ATP binding cassette transporter, binding protein           | 254361258         | Periplasmic 9.76         | Signal peptide             | 37410.5                       | 100.00%                            | 3                         | 4                        | 7                       | 0.09%                       | 9.83%                        |
| 131 | phosphate acetyltransferase                                                           | 254362832         | Cytoplasmic 9.97         | Cytoplasmic                | 76550                         | 100.00%                            | 6                         | 6                        | 9                       | 0.12%                       | 9.28%                        |
| 132 | phosphoenolpyruvate--protein phosphotransferase                                       | 254362262         | Cytoplasmic 9.97         | Cytoplasmic                | 63111.8                       | 100.00%                            | 6                         | 6                        | 10                      | 0.13%                       | 11.20%                       |
| 133 | phosphogluconate 2-dehydrogenase                                                      | 254362281         | Cytoplasmic 8.96         | Cytoplasmic                | 53547.6                       | 99.80%                             | 2                         | 2                        | 4                       | 0.05%                       | 4.96%                        |
| 134 | phosphoglycerate dehydrogenase                                                        | 254362642         | Cytoplasmic 9.97         | Cytoplasmic                | 44356.7                       | 99.80%                             | 2                         | 2                        | 2                       | 0.03%                       | 5.87%                        |
| 135 | phosphoglycerate kinase                                                               | 254360597         | Cytoplasmic 9.97         | Cytoplasmic                | 41548.2                       | 100.00%                            | 3                         | 3                        | 5                       | 0.07%                       | 7.42%                        |
| 136 | phosphoglycerate mutase                                                               | 254360758         | Cytoplasmic 8.96         | Cytoplasmic                | 25965.6                       | 100.00%                            | 3                         | 3                        | 8                       | 0.11%                       | 12.30%                       |
| 137 | phosphopyruvate hydratase                                                             | 254361471         | Cytoplasmic 9.97         | Cytoplasmic                | 46099.8                       | 100.00%                            | 6                         | 6                        | 16                      | 0.21%                       | 14.40%                       |
| 138 | pitrilysin                                                                            | 254361416         | Periplasmic 9.76         | signal peptide             | 110403                        | 99.80%                             | 2                         | 2                        | 4                       | 0.05%                       | 2.04%                        |
| 139 | polyribonucleotide nucleotidyltransferase                                             | 254361252         | Cytoplasmic 9.97         | Cytoplasmic                | 77834.8                       | 99.80%                             | 2                         | 2                        | 3                       | 0.04%                       | 3.49%                        |
| 140 | porin OmpW                                                                            | 254362806         | Unknown                  | Cytoplasmic                | 5,814.90                      | 100.00%                            | 5                         | 7                        | 29                      | 0.23%                       | 77.40%                       |
| 141 | possible adhesin                                                                      | 254362666         | Unknown                  | Signal peptide             | 14420.8                       | 99.80%                             | 2                         | 2                        | 4                       | 0.05%                       | 12.20%                       |
| 142 | possible arginine ABC superfamily ATP binding cassette transporter, binding protein   | 254360618         | Periplasmic 10.00        | Signal peptide             | 26,505.30                     | 100.00%                            | 3                         | 3                        | 13                      | 0.10%                       | 17.00%                       |
| 143 | possible cell division protein                                                        | 254362934         | CytoplasmicMembrane 9.82 | Cytoplasmic                | 30656.8                       | 99.80%                             | 2                         | 2                        | 2                       | 0.03%                       | 6.47%                        |
| 144 | possible hemin ABC superfamily ATP binding cassette transporter, binding protein HbpA | 254361671         | Periplasmic 10.00        | Signal peptide             | 59,616.20                     | 100.00%                            | 6                         | 6                        | 16                      | 0.13%                       | 22.80%                       |
| 145 | possible lipoprotein                                                                  | 254363154         | Periplasmic 9.44         | lipoprotein signal peptide | 20924.4                       | 100.00%                            | 7                         | 8                        | 29                      | 0.38%                       | 44.40%                       |
| 146 | possible lipoprotein                                                                  | 254360821         | Unknown                  | lipoprotein signal peptide | 10341                         | 99.50%                             | 2                         | 2                        | 5                       | 0.07%                       | 16.30%                       |
| 147 | possible lipoprotein                                                                  | 254362041         | Unknown                  | lipoprotein signal peptide | 19301.8                       | 100.00%                            | 3                         | 3                        | 5                       | 0.07%                       | 13.90%                       |
| 148 | possible lipoprotein                                                                  | 254360822         | Unknown                  | lipoprotein signal peptide | 10104.9                       | 99.80%                             | 2                         | 4                        | 14                      | 0.18%                       | 20.70%                       |
| 149 | possible lipoprotein                                                                  | 254361089         | OuterMembrane 9.92       | lipoprotein signal peptide | 18,211.80                     | 100.00%                            | 5                         | 6                        | 17                      | 0.14%                       | 37.00%                       |
| 150 | possible lipoprotein LolB                                                             | 254362960         | Unknown                  | lipoprotein signal peptide | 24033.9                       | 99.80%                             | 2                         | 2                        | 8                       | 0.11%                       | 11.40%                       |
| 151 | possible LysM domain protein                                                          | 254362289         | Cytoplasmic 9.97         | Cytoplasmic                | 15726.9                       | 99.80%                             | 2                         | 2                        | 2                       | 0.03%                       | 15.60%                       |

|     | Protein name                                                                                 | Protein GI number | PSORTb               | LipoP | Protein molecular weight (Da) | Protein identification probability | Number of unique peptides | Number of unique spectra | Number of total spectra | Percentage of total spectra | Percentage sequence coverage |        |
|-----|----------------------------------------------------------------------------------------------|-------------------|----------------------|-------|-------------------------------|------------------------------------|---------------------------|--------------------------|-------------------------|-----------------------------|------------------------------|--------|
| 152 | possible molybdenum (Mo2+) ABC superfamily ATP binding cassette transporter, binding protein | 254361790         | Periplasmic          | 10.00 | Signal peptide                | 27,590.10                          | 100.00%                   | 3                        | 3                       | 5                           | 0.04%                        | 11.20% |
| 153 | possible OMR family outer membrane hemoglobin receptor HmbR2                                 | 254362665         | Outer membrane       | 10.00 | Signal peptide                | 79464.7                            | 99.60%                    | 2                        | 2                       | 3                           | 0.04%                        | 2.36%  |
| 154 | possible outer membrane protein                                                              | 254361374         | OuterMembrane        | 9.49  | Signal peptide                | 37760.9                            | 100.00%                   | 5                        | 5                       | 12                          | 0.16%                        | 14.50% |
| 155 | possible outer membrane protein                                                              | 254360920         | Unknown              |       | Signal peptide                | 56076                              | 100.00%                   | 13                       | 14                      | 31                          | 0.41%                        | 25.60% |
| 156 | possible outer membrane protein                                                              | 254361137         | Unknown              |       | Signal peptide                | 37055.7                            | 100.00%                   | 8                        | 8                       | 15                          | 0.20%                        | 22.30% |
| 157 | possible protein-disulfide isomerase                                                         | 254360996         | Periplasmic          | 9.44  | Signal peptide                | 23586.6                            | 100.00%                   | 3                        | 3                       | 3                           | 0.04%                        | 15.60% |
| 158 | possible rhodanese domain sulfurtransferase                                                  | 254362707         | Unknown              |       | Signal peptide                | 12,810.90                          | 99.50%                    | 2                        | 3                       | 8                           | 0.06%                        | 23.10% |
| 159 | possible RND superfamily resistance-nodulation-cell division antiporter                      | 254361802         | OuterMembrane        | 9.92  | lipoprotein signal peptide    | 51440.5                            | 100.00%                   | 11                       | 11                      | 20                          | 0.26%                        | 19.80% |
| 160 | possible secreted acid phosphatase                                                           | 254362553         | OuterMembrane        | 9.92  | Cytoplasmic                   | 23,073.40                          | 100.00%                   | 9                        | 9                       | 35                          | 0.28%                        | 48.30% |
| 161 | possible siderophore ABC superfamily ATP binding cassette transporter, binding protein       | 254362167         | Cytoplasmic Membrane | 9.97  | Signal peptide                | 32,388.80                          | 100.00%                   | 5                        | 5                       | 15                          | 0.12%                        | 25.10% |
| 162 | possible thiamine ABC superfamily ATP binding cassette transporter, binding protein          | 254360649         | Periplasmic          | 10.00 | Signal peptide                | 33895                              | 100.00%                   | 3                        | 3                       | 7                           | 0.09%                        | 10.30% |
| 163 | possible transcriptional regulator                                                           | 254361842         | Unknown              |       | Signal peptide                | 19885.5                            | 99.70%                    | 2                        | 2                       | 5                           | 0.07%                        | 11.40% |
| 164 | possible transglutaminase                                                                    | 254362485         | Cytoplasmic          | 8.96  | Signal peptide                | 40888.5                            | 100.00%                   | 4                        | 4                       | 8                           | 0.11%                        | 10.30% |
| 165 | preprotein translocase subunit SecA                                                          | 254362009         | Cytoplasmic          | 9.12  | Cytoplasmic                   | 102306.8                           | 99.30%                    | 2                        | 2                       | 3                           | 0.04%                        | 1.98%  |
| 166 | protein disulfide-isomerase                                                                  | 254361859         | Periplasmic          | 9.76  | Signal peptide                | 25,110.20                          | 100.00%                   | 5                        | 5                       | 12                          | 0.10%                        | 26.90% |
| 167 | protein disulfide-isomerase                                                                  | 254363220         | Periplasmic          | 10.00 | Signal peptide                | 23,550.50                          | 100.00%                   | 5                        | 6                       | 22                          | 0.18%                        | 35.40% |
| 168 | pseudogene of conserved hypothetical protein                                                 | 32034625          | Unknown              |       | Cytoplasmic                   | 21410.8                            | 100.00%                   | 12                       | 15                      | 30                          | 0.39%                        | 52.50% |
| 169 | PTS family glucose porter component IIA                                                      | 254362261         | Cytoplasmic          | 9.97  | Cytoplasmic                   | 17812.6                            | 99.80%                    | 2                        | 2                       | 4                           | 0.05%                        | 10.80% |
| 170 | purine-nucleoside phosphorylase                                                              | 254360546         | Cytoplasmic          | 9.97  | Cytoplasmic                   | 25959.3                            | 100.00%                   | 3                        | 3                       | 8                           | 0.11%                        | 13.00% |
| 171 | pyruvate dehydrogenase (acetyl-transferring)                                                 | 254362997         | Cytoplasmic          | 9.97  | Cytoplasmic                   | 98900.9                            | 100.00%                   | 24                       | 27                      | 76                          | 1.00%                        | 28.10% |
| 172 | pyruvate kinase                                                                              | 254360636         | Cytoplasmic          | 9.97  | Cytoplasmic                   | 50046.5                            | 100.00%                   | 4                        | 4                       | 10                          | 0.13%                        | 9.66%  |
| 173 | recombinase RecA                                                                             | 254362313         | Cytoplasmic          | 9.97  | Cytoplasmic                   | 39658.6                            | 100.00%                   | 3                        | 3                       | 9                           | 0.12%                        | 7.88%  |
| 174 | riboflavin synthase beta subunit                                                             | 254361996         | Cytoplasmic          | 9.97  | Cytoplasmic                   | 16324.2                            | 100.00%                   | 3                        | 3                       | 6                           | 0.08%                        | 23.40% |
| 175 | ribose-phosphate diphosphokinase                                                             | 254363000         | Cytoplasmic          | 9.97  | Cytoplasmic                   | 34166.8                            | 100.00%                   | 4                        | 4                       | 6                           | 0.08%                        | 18.00% |
| 176 | ribosomal protein L1                                                                         | 254361444         | Cytoplasmic          | 9.26  | Cytoplasmic                   | 23940.8                            | 100.00%                   | 4                        | 4                       | 7                           | 0.09%                        | 21.40% |
| 177 | ribosomal protein L10                                                                        | 254361436         | Cytoplasmic          | 9.26  | Cytoplasmic                   | 17504.3                            | 99.80%                    | 2                        | 2                       | 6                           | 0.08%                        | 14.10% |
| 178 | ribosomal protein L11                                                                        | 254361445         | Cytoplasmic          | 9.26  | Cytoplasmic                   | 14915.6                            | 100.00%                   | 4                        | 4                       | 10                          | 0.13%                        | 27.50% |
| 179 | ribosomal protein L14                                                                        | 254362787         | Cytoplasmic          | 9.26  | Cytoplasmic                   | 11274.6                            | 99.40%                    | 2                        | 2                       | 5                           | 0.07%                        | 17.50% |
| 180 | ribosomal protein L15                                                                        | 254362778         | Cytoplasmic          | 9.97  | Cytoplasmic                   | 15099.3                            | 100.00%                   | 6                        | 6                       | 11                          | 0.14%                        | 42.40% |
| 181 | ribosomal protein L16                                                                        | 254362067         | Cytoplasmic          | 9.26  | Cytoplasmic                   | 15170.3                            | 100.00%                   | 3                        | 3                       | 6                           | 0.08%                        | 21.30% |
| 182 | ribosomal protein L17                                                                        | 254362771         | Cytoplasmic          | 9.26  | Cytoplasmic                   | 14385                              | 100.00%                   | 3                        | 3                       | 9                           | 0.12%                        | 14.80% |
| 183 | ribosomal protein L19                                                                        | 254362948         | Cytoplasmic          | 9.97  | Cytoplasmic                   | 13141.4                            | 100.00%                   | 5                        | 5                       | 8                           | 0.11%                        | 47.40% |
| 184 | ribosomal protein L2                                                                         | 254362071         | Cytoplasmic          | 9.97  | Cytoplasmic                   | 29858.9                            | 100.00%                   | 7                        | 9                       | 22                          | 0.29%                        | 31.10% |
| 185 | ribosomal protein L22                                                                        | 254362069         | Cytoplasmic          | 9.26  | Cytoplasmic                   | 12133.5                            | 99.50%                    | 2                        | 2                       | 4                           | 0.05%                        | 10.00% |
| 186 | ribosomal protein L3                                                                         | 254362074         | Cytoplasmic          | 9.97  | Cytoplasmic                   | 22449.9                            | 100.00%                   | 7                        | 8                       | 22                          | 0.29%                        | 34.00% |
| 187 | ribosomal protein L4                                                                         | 254362073         | Cytoplasmic          | 9.97  | Cytoplasmic                   | 22000.3                            | 100.00%                   | 3                        | 3                       | 6                           | 0.08%                        | 12.00% |
| 188 | ribosomal protein L5                                                                         | 254362785         | Cytoplasmic          | 9.97  | Cytoplasmic                   | 20266.4                            | 100.00%                   | 5                        | 5                       | 15                          | 0.20%                        | 27.40% |

|     | Protein name                                                                            | Protein GI number | PSORTb               | LipoP | Protein molecular weight (Da) | Protein identification probability | Number of unique peptides | Number of unique spectra | Number of total spectra | Percentage of total spectra | Percentage sequence coverage |        |
|-----|-----------------------------------------------------------------------------------------|-------------------|----------------------|-------|-------------------------------|------------------------------------|---------------------------|--------------------------|-------------------------|-----------------------------|------------------------------|--------|
| 189 | ribosomal protein L6                                                                    | 254362782         | Cytoplasmic          | 9.26  | Cytoplasmic                   | 18868.6                            | 100.00%                   | 4                        | 4                       | 10                          | 0.13%                        | 22.00% |
| 190 | ribosomal protein L7/L12                                                                | 254361435         | Cytoplasmic          | 9.26  | Cytoplasmic                   | 12301.3                            | 99.80%                    | 2                        | 2                       | 4                           | 0.05%                        | 20.50% |
| 191 | ribosomal protein L9                                                                    | 254361770         | Cytoplasmic          | 9.26  | Cytoplasmic                   | 15179.9                            | 100.00%                   | 5                        | 5                       | 13                          | 0.17%                        | 37.60% |
| 192 | ribosomal protein S1                                                                    | 254361237         | Cytoplasmic          | 9.97  | Cytoplasmic                   | 60160.3                            | 100.00%                   | 9                        | 9                       | 17                          | 0.22%                        | 16.60% |
| 193 | ribosomal protein S10                                                                   | 16272717          | Cytoplasmic          | 9.26  | Cytoplasmic                   | 11748.8                            | 100.00%                   | 4                        | 4                       | 8                           | 0.11%                        | 41.70% |
| 194 | ribosomal protein S11                                                                   | 254362774         | Cytoplasmic          | 9.26  | Cytoplasmic                   | 13885.1                            | 99.80%                    | 2                        | 2                       | 4                           | 0.05%                        | 15.50% |
| 195 | ribosomal protein S13                                                                   | 32034697          | Cytoplasmic          | 9.97  | Cytoplasmic                   | 13251.2                            | 100.00%                   | 5                        | 5                       | 7                           | 0.09%                        | 43.20% |
| 196 | ribosomal protein S15                                                                   | 32033979          | Cytoplasmic          | 9.26  | Cytoplasmic                   | 10162.3                            | 99.90%                    | 2                        | 2                       | 3                           | 0.04%                        | 15.70% |
| 197 | ribosomal protein S2                                                                    | 254360753         | Cytoplasmic          | 9.97  | Cytoplasmic                   | 26311.9                            | 100.00%                   | 4                        | 4                       | 8                           | 0.11%                        | 17.10% |
| 198 | ribosomal protein S3                                                                    | 254362068         | Cytoplasmic          | 9.97  | Cytoplasmic                   | 25779.6                            | 100.00%                   | 5                        | 5                       | 12                          | 0.16%                        | 23.80% |
| 199 | ribosomal protein S4                                                                    | 254362773         | Cytoplasmic          | 9.97  | Cytoplasmic                   | 23805.9                            | 100.00%                   | 6                        | 6                       | 12                          | 0.16%                        | 25.00% |
| 200 | ribosomal protein S5                                                                    | 254362780         | Cytoplasmic          | 9.97  | Cytoplasmic                   | 17488                              | 99.90%                    | 2                        | 2                       | 6                           | 0.08%                        | 12.70% |
| 201 | ribosomal protein S6***                                                                 | 53729064          | Cytoplasmic          | 9.97  | Cytoplasmic                   | 14054.3                            | 99.80%                    | 2                        | 2                       | 7                           | 0.09%                        | 14.50% |
| 202 | ribosomal protein S7                                                                    | 254362573         | Cytoplasmic          | 9.26  | Cytoplasmic                   | 17612.8                            | 100.00%                   | 5                        | 5                       | 14                          | 0.18%                        | 30.80% |
| 203 | ribosomal protein S8                                                                    | 254362783         | Cytoplasmic          | 9.26  | Cytoplasmic                   | 14070.7                            | 100.00%                   | 4                        | 5                       | 11                          | 0.14%                        | 36.90% |
| 204 | ribosomal protein S9                                                                    | 254362052         | Cytoplasmic          | 9.97  | Cytoplasmic                   | 14712.5                            | 100.00%                   | 5                        | 6                       | 15                          | 0.20%                        | 45.80% |
| 205 | S1C subfamily peptidase Do                                                              | 254362428         | Periplasmic          | 9.76  | Signal peptide                | 49070.4                            | 99.80%                    | 2                        | 2                       | 5                           | 0.07%                        | 4.53%  |
| 206 | S6 family IgA-specific metalloendopeptidase                                             | 254360993         | OuterMembrane        | 9.83  | Signal peptide                | 155611.7                           | 100.00%                   | 50                       | 59                      | 173                         | 2.27%                        | 36.00% |
| 207 | S6 family igA-specific metalloendopeptidase                                             | 254363217         | OuterMembrane        | 9.82  | Signal peptide                | 164482.9                           | 100.00%                   | 3                        | 4                       | 7                           | 0.09%                        | 3.46%  |
| 208 | serotype 1-specific antigen                                                             | 254362906         | OuterMembrane        | 9.83  | Signal peptide                | 103570.4                           | 100.00%                   | 69                       | 110                     | 672                         | 8.82%                        | 59.50% |
| 209 | SmpA family lipoprotein                                                                 | 254361732         | OuterMembrane        | 9.93  | lipoprotein signal peptide    | 12,919.40                          | 100.00%                   | 3                        | 3                       | 17                          | 0.14%                        | 33.60% |
| 210 | spermidine/putrescine ABC superfamily ATP binding cassette transporter, binding protein | 254362547         | Periplasmic          | 9.44  | Cytoplasmic                   | 36047.1                            | 100.00%                   | 3                        | 3                       | 7                           | 0.09%                        | 7.12%  |
| 211 | succinate dehydrogenase                                                                 | 254362603         | Cytoplasmic          | 7.88  | Cytoplasmic                   | 66123.9                            | 99.80%                    | 2                        | 2                       | 2                           | 0.03%                        | 5.33%  |
| 212 | superoxide dismutase                                                                    | 254360578         | Unknown              |       | Cytoplasmic                   | 23,793.80                          | 99.90%                    | 2                        | 2                       | 5                           | 0.04%                        | 8.45%  |
| 213 | TonB family auxiliary protein TolB                                                      | 254362584         | Periplasmic          | 9.44  | Signal peptide                | 41238.1                            | 100.00%                   | 13                       | 15                      | 39                          | 0.51%                        | 34.10% |
| 214 | TonB family auxiliary protein TolQ                                                      | 254362581         | Cytoplasmic Membrane | 10.00 | Cytoplasmic                   | 25219.7                            | 100.00%                   | 3                        | 3                       | 7                           | 0.09%                        | 15.50% |
| 215 | transaldolase                                                                           | 254361180         | Cytoplasmic          | 8.96  | Cytoplasmic                   | 35193.1                            | 100.00%                   | 3                        | 3                       | 4                           | 0.05%                        | 9.81%  |
| 216 | transferrin binding protein A                                                           | 254360640         | OuterMembrane        | 10.00 | Signal peptide                | 106470                             | 100.00%                   | 39                       | 46                      | 109                         | 1.43%                        | 37.60% |
| 217 | transferrin binding protein B                                                           | 254360641         | Outer Membrane       | 9.49  | lipoprotein signal peptide    | 63734.4                            | 100.00%                   | 40                       | 54                      | 152                         | 1.99%                        | 67.90% |
| 218 | transketolase                                                                           | 254361985         | Cytoplasmic          | 9.97  | Cytoplasmic                   | 73480.8                            | 100.00%                   | 10                       | 10                      | 15                          | 0.20%                        | 15.90% |
| 219 | TRAP-T family tripartite ATP-independent periplasmic transporter, binding protein       | 254362109         | Unknown              |       | Signal peptide                | 34505.8                            | 100.00%                   | 5                        | 5                       | 8                           | 0.11%                        | 16.60% |
| 220 | TRAP-T family tripartite ATP-independent periplasmic transporter, binding protein       | 254361692         | Periplasmic          | 9.76  | Signal peptide                | 36,157.00                          | 99.80%                    | 2                        | 2                       | 5                           | 0.04%                        | 6.10%  |
| 221 | trimethylamine-N-oxide reductase (cytochrome c)                                         | 254361297         | Periplasmic          | 10.00 | Signal peptide                | 91417.3                            | 99.80%                    | 2                        | 2                       | 4                           | 0.05%                        | 2.17%  |
| 222 | triose-phosphate isomerase                                                              | 254362191         | Cytoplasmic          | 9.26  | Cytoplasmic                   | 27495.5                            | 99.90%                    | 2                        | 2                       | 5                           | 0.07%                        | 6.08%  |

|     | <b>Protein name</b>                 | <b>Protein GI number</b> | <b>PSORTb</b> | <b>LipoP</b> | <b>Protein molecular weight (Da)</b> | <b>Protein identification probability</b> | <b>Number of unique peptides</b> | <b>Number of unique spectra</b> | <b>Number of total spectra</b> | <b>Percentage of total spectra</b> | <b>Percentage sequence coverage</b> |        |
|-----|-------------------------------------|--------------------------|---------------|--------------|--------------------------------------|-------------------------------------------|----------------------------------|---------------------------------|--------------------------------|------------------------------------|-------------------------------------|--------|
| 223 | UDP-N-acetylglucosamine 2-epimerase | 254360953                | Cytoplasmic   | 9.97         | Cytoplasmic                          | 41406.6                                   | 100.00%                          | 3                               | 3                              | 5                                  | 0.07%                               | 9.43%  |
| 224 | UDP-sugar diphosphatase             | 254361285                | Periplasmic   | 9.76         | Signal peptide                       | 60961.4                                   | 100.00%                          | 4                               | 4                              | 5                                  | 0.07%                               | 7.68%  |
| 225 | uracil phosphoribosyltransferase    | 254362984                | Cytoplasmic   | 9.97         | Cytoplasmic                          | 22727.4                                   | 100.00%                          | 3                               | 3                              | 8                                  | 0.11%                               | 13.40% |
| 226 | uridine phosphorylase               | 254360938                | Cytoplasmic   | 9.97         | Cytoplasmic                          | 27332.1                                   | 100.00%                          | 5                               | 5                              | 12                                 | 0.16%                               | 19.40% |
